# Supplementary material for: A Novel Lysophosphatidic Acid Acyltransferase of Escherichia coli Produces Membrane Phospholipids with a cis-vaccenoyl Group and Is Related to Flagellar Formation
Source: MDPI journal article supplement (doi:10.3390/biom10050745), 2020-05-11
Supplement: s1 [file s1]

## Supplementary Materials

**Table S1. Bacterial strains and plasmids used in this study**

| Strain or Plasmid                 | Description                                                                                                           | Reference |
|-----------------------------------|-----------------------------------------------------------------------------------------------------------------------|-----------|
| Strains                           |                                                                                                                       |           |
| <i>E. coli</i> JC201              | <i>plsC</i> temperature-sensitive mutant                                                                              | [35]      |
| <i>E. coli</i> BW25113            | <i>lacI<sup>q</sup> rrnB<sub>T14</sub> ΔlacZ<sub>WJ16</sub> hsdR514 ΔaraBAD<sub>AH33</sub> ΔrhaBAD<sub>LD78</sub></i> | NBRP      |
| <i>E. coli</i> Δ <i>yihG</i>      | BW25113 Δ <i>yihG</i> Ω Km <sup>R</sup>                                                                               | NBRP      |
| Plasmids                          |                                                                                                                       |           |
| pBAD28                            | Amp <sup>R</sup> , Cm <sup>R</sup> ; An arabinose-inducible vector                                                    | [41]      |
| pBAD-Cm <sup>R</sup>              | Cm <sup>R</sup> ; A ScaI-digested and self-ligated pBAD28                                                             | This work |
| pBAD/ <i>yihG-his<sub>6</sub></i> | Cm <sup>R</sup> ; A pBAD-Cm <sup>R</sup> derivative containing <i>yihG-his<sub>6</sub></i> at the Sall-HindIII site   | This work |
| pBAD/ <i>plsC-his<sub>6</sub></i> | Cm <sup>R</sup> ; A pBAD-Cm <sup>R</sup> derivative containing <i>plsC-his<sub>6</sub></i> at the Sall-HindIII site   | This work |

**Table S2. Sequences of primers used in this study**

|                                            |                                                                       |
|--------------------------------------------|-----------------------------------------------------------------------|
| For construction of pBAD/ <i>plsC-his6</i> |                                                                       |
| Fw                                         | 5'-ATCCTCTAGAGTCGACATGCTATATATCTTTTCGTCTTATTATTACCG-3'                |
| Rv                                         | 5'-CAAAACAGCCAAGCTTTTAGTGGTGATGGTGATGATGAAGCTTAACTTTTCCGGCGGCTTC-3'   |
| For construction of pBAD/ <i>yihG-his6</i> |                                                                       |
| Fw                                         | 5'-ATCCTCTAGAGTCGACATGGCTAACCTTTTGAATAAATTC-3'                        |
| Rv                                         | 5'-CAAAACAGCCAAGCTTTTAGTGGTGATGGTGATGATGAAGCTTCTTATTCTGACGCTGTGATG-3' |

**Table S3. Fatty acyl groups of PEs from the wild-type and  $\Delta yihG$  cells harboring the plasmids found in Figure 2A**

| PE   | <i>m/z</i> | WT/EV and $\Delta yihG$ /EV                             | $\Delta yihG$ /YihG                                     |
|------|------------|---------------------------------------------------------|---------------------------------------------------------|
| 28:0 | 634        | 14:0/14:0, 16:0/12:0                                    | 14:0/14:0, 16:0/12:0                                    |
| 29:0 | 648        | N.D.                                                    | 15:0/14:0, 16:0/13:0                                    |
| 30:1 | 660        | 14:0/16:1, 16:0/14:1, 18:1/12:0                         | 16:1/14:0, 16:0/14:1, 18:1/12:0                         |
| 30:0 | 662        | 16:0/14:0                                               | 16:0/14:0                                               |
| 31:1 | 674        | 15:0/16:1, 14:0/17:0cyclo                               | 15:0/16:1, 17:0cyclo/14:0                               |
| 31:0 | 676        | 16:0/15:0, 14:0/17:0                                    | 16:0/15:0, 17:0/14:0                                    |
| 32:2 | 686        | 16:1/16:1                                               | 16:1/16:1                                               |
| 32:1 | 688        | 16:0/16:1                                               | 16:0/16:1, 18:1/14:0                                    |
| 32:0 | 690        | 16:0/16:0                                               | 16:0/16:0                                               |
| 33:2 | 700        | 17:0cyclo/16:1                                          | 17:0cyclo/16:1                                          |
| 33:1 | 702        | 16:0/17:0cyclo                                          | 16:0/17:0cyclo                                          |
| 33:0 | 704        | 16:0/17:0                                               | 16:0/17:0, 19:0/14:0                                    |
| 34:2 | 714        | 18:1/16:1                                               | 18:1/16:1                                               |
| 34:1 | 716        | 16:0/18:1                                               | 16:0/18:1                                               |
| 35:2 | 728        | 18:1/17:0cyclo, 19:0cyclo/16:1                          | 18:1/17:0cyclo, 19:0cyclo/16:1                          |
| 35:1 | 730        | 18:0/17:0cyclo, 16:0/19:0cyclo, 17:0/18:1,<br>19:0/16:1 | 18:0/17:0cyclo, 19:0cyclo/16:0, 18:1/17:0,<br>19:0/16:1 |
| 36:2 | 742        | 18:1/18:1                                               | 18:1/18:1                                               |
| 36:1 | 744        | 18:0/18:1                                               | 18:0/18:1                                               |

17:0cyclo and 19:0cyclo are the cyclopropane derivatives of 16:1 and 18:1, respectively. The *sn*-1/*sn*-2 fatty acyl groups as estimated from the peak intensities of MS/MS analysis are shown.

**Table S4. Fatty acyl groups of PGs from the wild-type and  $\Delta yihG$  cells harboring the plasmids found in Figure 2B**

| PG   | <i>m/z</i> | WT/EV and $\Delta yihG$ /EV                             | $\Delta yihG$ /YihG                                     |
|------|------------|---------------------------------------------------------|---------------------------------------------------------|
| 28:0 | 665        | N.D.                                                    | 14:0/14:0, 16:0/12:0                                    |
| 29:0 | 679        | N.D.                                                    | 15:0/14:0, 16:0/13:0                                    |
| 30:1 | 691        | 14:0/16:1, 14:1/16:0                                    | 16:1/14:0, 14:1/16:0, 12:0/18:1                         |
| 30:0 | 693        | 16:0/14:0                                               | 16:0/14:0                                               |
| 31:1 | 705        | 15:0/16:1                                               | 15:0/16:1, 17:0cyclo/14:0                               |
| 31:0 | 707        | N.D.                                                    | 16:0/15:0, 17:0/14:0                                    |
| 32:1 | 719        | 16:0/16:1                                               | 16:0/16:1, 18:1/14:0                                    |
| 32:0 | 721        | 16:0/16:0                                               | 16:0/16:0, 18:0/14:0                                    |
| 33:2 | 731        | 17:0cyclo/16:1, 14:0/19:0cyclo                          | 16:1/17:0cyclo, 19:0cyclo/14:0                          |
| 33:1 | 733        | 16:0/17:0cyclo, 15:0/18:1                               | 16:0/17:0cyclo, 18:1/15:0, 19:0cyclo/14:0               |
| 33:0 | 735        | 16:0/17:0                                               | 17:0/16:0, 19:0/14:0                                    |
| 34:2 | 745        | 18:1/16:1                                               | 18:1/16:1                                               |
| 34:1 | 747        | 16:0/18:1                                               | 16:0/18:1                                               |
| 35:2 | 759        | 18:1/17:0cyclo, 19:0cyclo/16:1                          | 18:1/17:0cyclo, 19:0cyclo/16:1                          |
| 35:1 | 761        | 18:0/17:0cyclo, 16:0/19:0cyclo, 17:0/18:1,<br>19:0/16:1 | 18:0/17:0cyclo, 18:1/17:0, 19:0cyclo/16:0,<br>19:0/16:1 |
| 36:2 | 773        | 18:1/18:1                                               | 18:1/18:1                                               |
| 36:1 | 775        | 18:0/18:1                                               | 18:0/18:1                                               |

17:0cyclo and 19:0cyclo are the cyclopropane derivatives of 16:1 and 18:1, respectively. The *sn*-1/*sn*-2 fatty acyl groups as estimated from the peak intensities of MS/MS analysis are shown.

|         |                                                                                |
|---------|--------------------------------------------------------------------------------|
| YihG    | MANLLNKFIMTRILAAITLLLSIVLTILVTIFCSVPPIIIAGIVKLLLVPVVIWRKVSRFC                  |
| SlPlsC4 | -----MLAFLPGPILFIISLSLLIINTVVWSTLLTIGGVAKLLLPFLPARQLLTRIM                      |
| PlsC    | -----MLYIFRLIITVIYSILVCVFGSIYCLFSPRNPKHVATFGH                                  |
| YihG    | DFMMYCWEGLAVLLHLNPHLQWEVHGLEGLSKKNWYLLIC <b>NH</b> RSW <b>AD</b> IVVLCVLFRKHI  |
| SlPlsC4 | NRFMWSWATCNGGILYLISNIEWDVKGLEKLDPNGWYLLIS <b>NH</b> VSG <b>F</b> DIAAQTYLLRNHI |
| PlsC    | MFGRLAPLFGGLKVECRKPTDAESYGN-----AIYIA <b>NH</b> QNNY <b>D</b> MVTASNIVQ---     |
|         | <u>Motif I</u>                                                                 |
| YihG    | PMNKYFLKQQLAWVPFLGLACWSLDMPFMK <b>R</b> YSRAYLLRHPERRGKDVEPTRRSCEKFRL          |
| AcPlsC4 | PMLKFFLK KELLYVPIMGLGCWALDMPFMD <b>R</b> TSAAKLKKNPKLKGKDLQTRKACERFKH          |
| PlsC    | PPTVTVGKKSLLWIPFFGQLYWLT <b>TGNLLID</b> <b>R</b> NNRTKAHG-----TIAEVVNHFKK      |
|         | <u>Motif II</u>                                                                |
| YihG    | HPTTIVNFV <b>EGSR</b> FTQEKHQQTHSTFQNLPPKAAGIAMALNVLGKQFDKLLNVTLCYPD           |
| SlPlsC4 | MPTSIINYV <b>EGSR</b> FTEEKRLRQNSPYRHLLRPKASGIAFTLSAMGEQFTGLLNITLVYPE          |
| PlsC    | RRISIWMP <b>EGT</b> RSRGRG-----LLPFKTGAFHAAIAAGVPII <b>P</b> VCVSTTSN--        |
|         | <u>Motif III</u> <span style="float: right;"><u>Motif IV</u></span>            |
| YihG    | NNRQPFDMLSGKLTRIVVHVDLQPIADELHGDYINDKSFKRHFQQWLNLSLWQEKDRLLT                   |
| SlPlsC4 | TSEKVLTNVMHGRTKKVVVRIETLPVPKVDSEVYFSSPETRVEFQRWLNQLWVEKDQQID                   |
| PlsC    | -----KINLNRLHNGLVIVEMLPPIDVSQYGKDQVRELAHCRSIMEQKIAELDKEVA                      |
| YihG    | SLMSSQRQNK                                                                     |
| SlPlsC4 | DIIKAYQQQ-                                                                     |
| PlsC    | EREAAGKV--                                                                     |

**Figure S1.** Multiple sequence alignment of YihG, SlPlsC4, and PlsC. The amino acid sequence of YihG from *E. coli* BW25113 (accession number, AIN34165) was aligned with those of SlPlsC4 from *S. livingstonensis* Ac10 (BBD74888) and PlsC from *E. coli* BW25113 (AIN33369) using the CLUSTALW algorithm on the GenomeNet website (<https://www.genome.jp/tools-bin/clustalw>). The regions of four conserved acyltransferase motifs described previously [32,39] are underlined, and the key residues in each motif are highlighted in red.

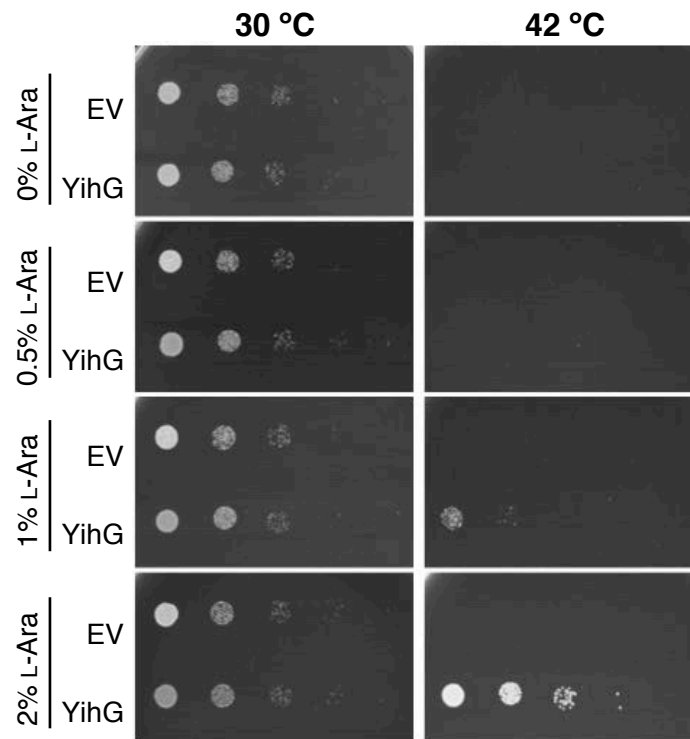

**Figure S2.** Overexpression of YihG in the JC201 cells. Serially diluted JC201 cells harboring pBAD-Cm<sup>R</sup> empty vector (EV) or pBAD/*yihG-his<sub>6</sub>* (YihG) were grown on LB plates containing 0%, 0.5%, 1%, and 2% L-arabinose at 30 °C and 42 °C for 12-14 h.

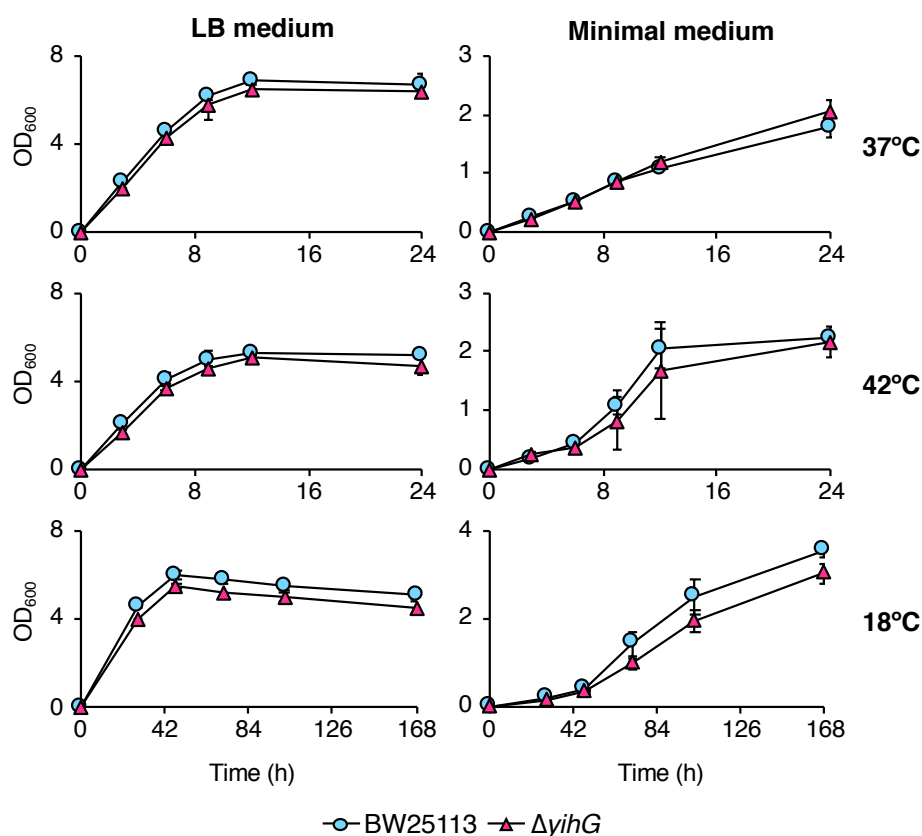

**Figure S3.** Growth characteristics of the  $\Delta yihG$  cells in LB and minimal medium. The growth of the wild-type (circle, light blue) and  $\Delta yihG$  (triangle, pink) cells at 37 °C, 42 °C, and 18 °C in LB and minimal medium was monitored. Each data point is the average of three biological replicates  $\pm$  SD.

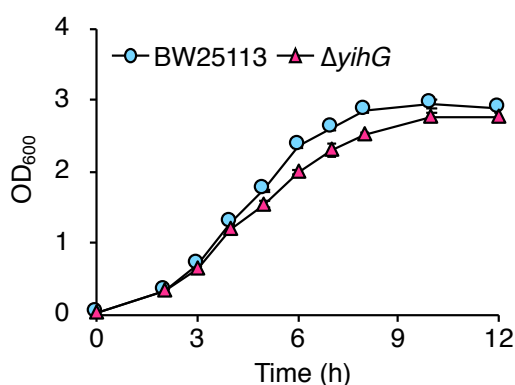

**Figure S4.** Growth characteristics of the  $\Delta yihG$  cells in TB. The growth of the wild-type (circle, light blue) and  $\Delta yihG$  (triangle, pink) cells at 37 °C in TB was monitored. Each data point is the average of three biological replicates  $\pm$  SD.

**Video S1.** Observation of the swimming  $\Delta yihG$  cells in liquid medium. The wild-type (left panel) and  $\Delta yihG$  (right panel) cells were grown at 37 °C in TB. The cultivated cells were diluted with fresh TB medium and observed at room temperature under the microscope.
